# Supplementary material for: Aberrant perceptual judgements on speech-relevant acoustic features in hallucination-prone individuals
Source: bioRxiv or medRxiv preprint supplement (doi:10.1101/2020.06.26.171330), 2020-10-16
Supplement: Supplementary file [file media-1.pdf]

## Supplementary Information for

### **Aberrant perceptual judgements on speech-relevant acoustic features in hallucination-prone individuals**

Julia Erb<sup>1</sup>, Jens Kreitewolf<sup>1</sup>, Ana P. Pinheiro<sup>3</sup>, & Jonas Obleser<sup>1,2</sup>

<sup>1</sup> Department of Psychology, University of Lübeck, Lübeck, Germany

<sup>2</sup> Center for Brain, Behavior, and Metabolism, University of Lübeck, Lübeck, Germany

<sup>3</sup> Faculdade de Psicologia, Universidade de Lisboa (FPUL), Lisbon, Portugal

\*Correspondence: Julia Erb, Maria-Gœppert-Str. 9a, 23562 Lübeck, Germany  
Phone: +49 451 3101 3631, e-mail: [julia.erb@uni-luebeck.de](mailto:julia.erb@uni-luebeck.de)

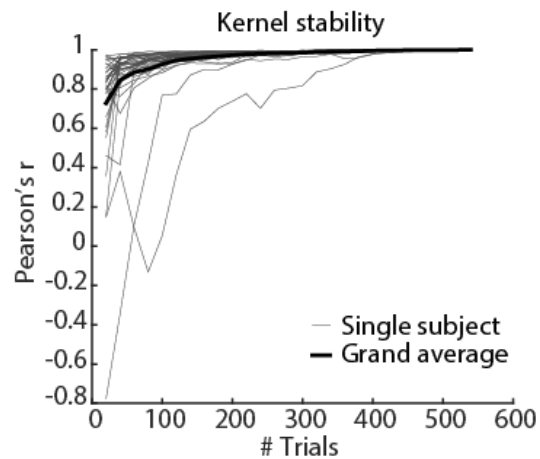

**Figure S1. Stability of speechiness kernels in the lab experiment.** Correlation of speechiness kernels with the final kernel (based on all trials) as a function of the numbers of trials used to estimate the kernel. On average, speechiness kernels based on the first 100 trials were highly similar to the final kernel, which we took as evidence that 108 trials are sufficient for the online experiment to obtain a reliable estimate of the speechiness kernel.
